# Supplementary material for: A high-temperature supramolecular-based switchable dielectric material with electrical bistability between high and low dielectric states
Source: Royal Society of Chemistry journal article supplement (doi:10.1039/c4ce02028f), 2015-01-01
Supplement: c4ce02028f1.pdf [file c4ce02028f1.pdf]

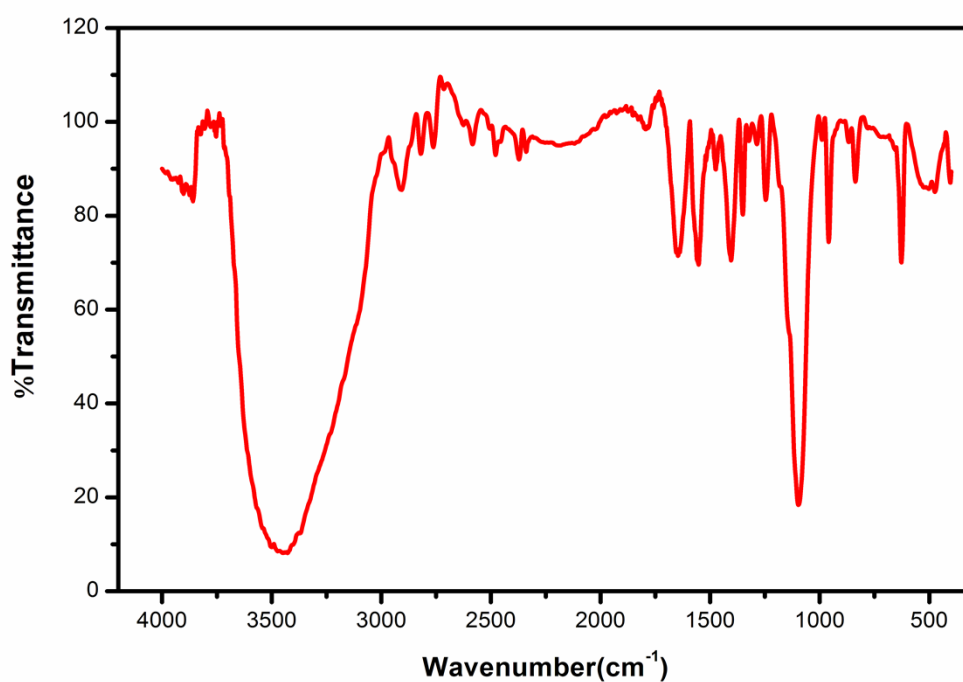

**Fig.S1** The IR spectrum for compound 1

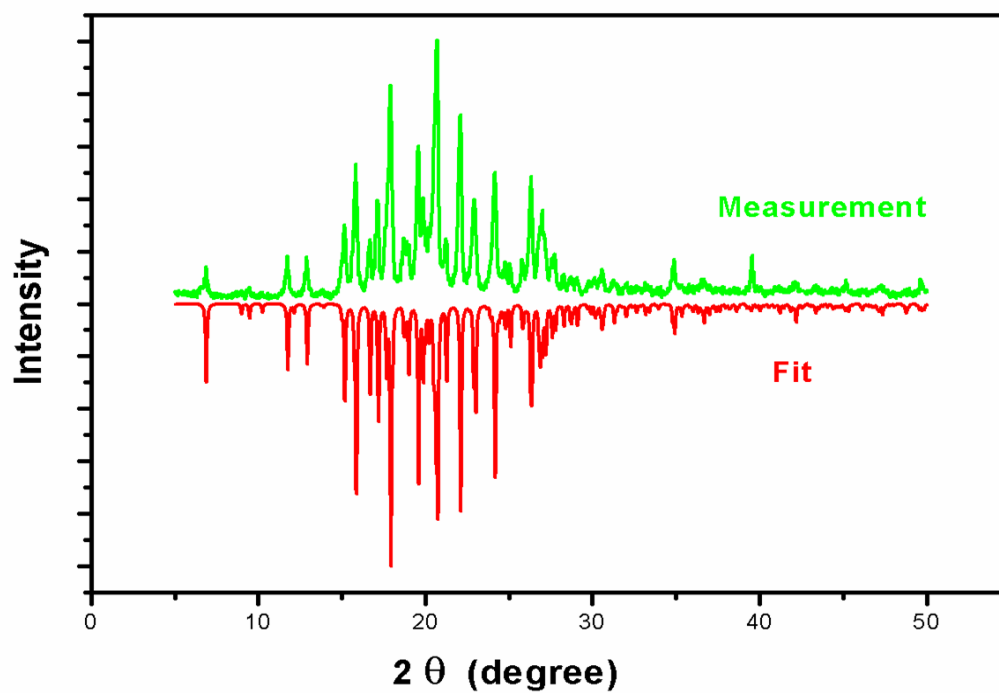

**Fig.S2** The powder X-ray diffraction (PXRD) pattern for compound 1

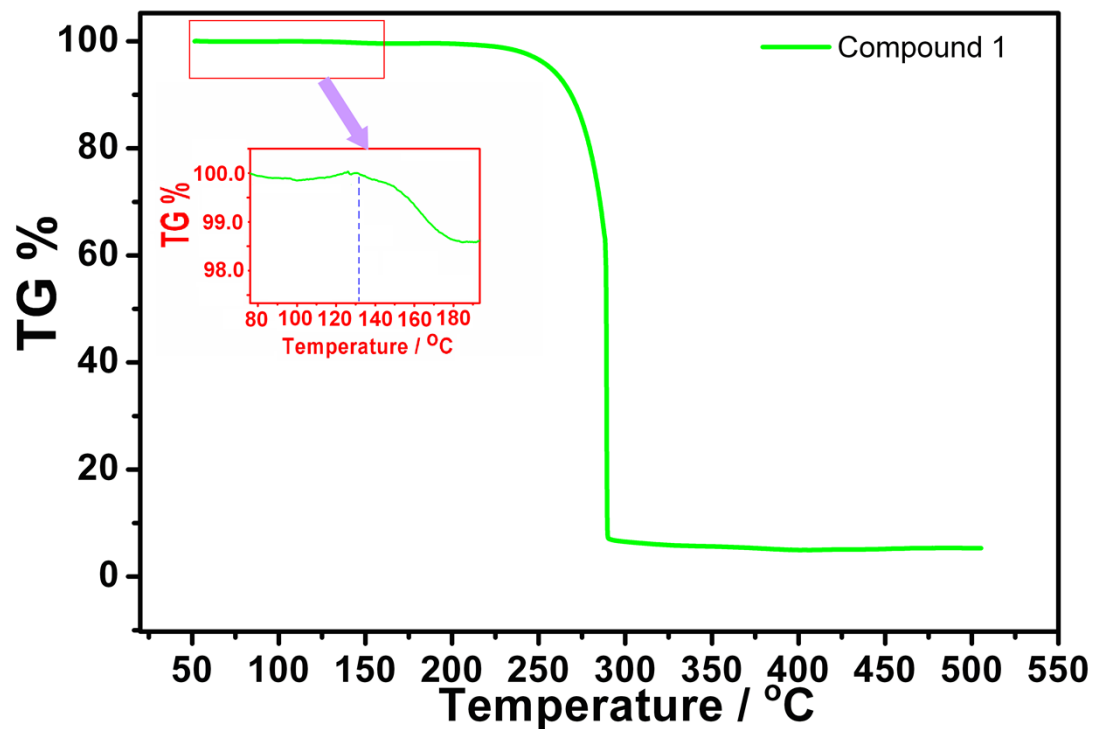

Fig.S3 Thermogravimetric(TG) measurements of compound 1 in N2 atmosphere.

Structure refinement:

The restraints (SIMU, DELU and FREE) were used to improve the quality of the refinements of the two structures.

For 293k: simu o11 c12 o10, delu o11 c12 o10, free c11 c11', free c6 c6'.

For 383k: dfix 1.45 c12 o11, simu c12 o12 o13 o14 o3 c6 c6' c3, delu o3 c6 c6' c3, free c11 c11', free c6 c6'.

**Table S1 Selected structural data for 1 under 293K**

| <i>Bond lengths / Å and bond angles / °</i> |          |                     |          |  |
|---------------------------------------------|----------|---------------------|----------|--|
| Cl(1)-O(7)                                  | 1.399(4) | Cl(2)-O(11)         | 1.194(5) |  |
| Cl(1)-O(7)#2                                | 1.399(4) | Cl(2)-O(13)         | 1.255(1) |  |
| Cl(1)-O(10)                                 | 1.419(7) | Cl(2)-O(13)#1       | 1.255(1) |  |
| Cl(1)-O(9)                                  | 1.425(6) | Cl(2)-O(12)         | 1.361(1) |  |
| O(7)-Cl(1)-O(7)#2                           | 110.1(5) | O(11)-Cl(2)-O(13)   | 118.6(9) |  |
| O(7)-Cl(1)-O(10)                            | 109.8(3) | O(11)-Cl(2)-O(13)#1 | 118.6(9) |  |
| O(7)#2-Cl(1)-O(10)                          | 109.8(3) | O(13)-Cl(2)-O(13)#1 | 109.4(1) |  |
| O(7)-Cl(1)-O(9)                             | 109.3(3) | O(11)-Cl(2)-O(12)   | 97.4(1)  |  |
| O(7)#2-Cl(1)-O(9)                           | 109.3(3) | O(13)-Cl(2)-O(12)   | 105.1(1) |  |
| O(10)-Cl(1)-O(9)                            | 108.6(5) | O(13)#1-Cl(2)-O(12) | 105.1(1) |  |

  

| <i>Hydrogen bonds / Å and °</i> |        |          |          |        |
|---------------------------------|--------|----------|----------|--------|
| D-H···A                         | d(D-H) | d(H···A) | d(D···A) | <(DHA) |
| N(1)-H(1C)...O(2)#3             | 0.91   | 2.12     | 2.95(2)  | 151(2) |
| N(1)-H(1C)...O(1)#3             | 0.91   | 2.23     | 2.90(1)  | 130(5) |
| N(1)-H(1E)...O(3)#3             | 0.92   | 2.16     | 2.88(3)  | 135(3) |
| N(1)-H(1E)...O(3)#4             | 0.92   | 2.16     | 2.88(3)  | 135(3) |
| N(2)-H(2D)...O(10)#5            | 0.92   | 2.19     | 3.09(1)  | 168(4) |
| N(2)-H(2C)...O(12)              | 0.91   | 2.55     | 3.44(3)  | 163(1) |
| O(1W)-H(1WB)...O(2)             | 0.86   | 2.33     | 3.10 (2) | 151(3) |

Symmetry transformations used to generate equivalent atoms: #1 x, -y+1/2, z  
#2 x, -y+3/2, z; #3 x, -y+1/2, z+1; #4 x, y, z+1; #5 2-x, -1/2 + y, 1-z

**Table S2 Selected structural data for 1 under 368k**

---

*Bond lengths / Å and bond angles / °*

---

|                     |            |                       |                 |
|---------------------|------------|-----------------------|-----------------|
| Cl(1)-O(7)          | 1.409(2)   | Cl(1)-O(7)#2          | 1.409 (2)       |
| Cl(1)-O(10)         | 1.421(3)   | Cl(1)-O(9)            | 1.430(3)        |
| Cl(2)-O(16)         | 1.385(8)   | Cl(2)-O(13)           | 1.378(4)        |
| Cl(2)-O(13)#1       | 1.378(4)   | Cl(2)-O(14)           | 1.271(4)        |
| Cl(2)-O(15)#1       | 1.376(1)   | Cl(2)-O(11)           | 1.432(6)        |
| Cl(2)-O(15)         | 1.376(1)   | Cl(2)-O(12)           | 1.508(9)        |
| Cl(2)-O(17)         | 1.444(2)   |                       |                 |
| O(7)-Cl(1)-O(7)#2   | 109.79(19) | O(7)-Cl(1)-O(10)      | 108.8(3)        |
| O(7)#2-Cl(1)-O(10)  | 108.82(13) | O(7)-Cl(1)-O(9)       | 109.8(1)        |
| O(7)#2-Cl(1)-O(9)   | 109.89(10) | O(10)-Cl(1)-O(9)      | 109.6(2)        |
| O(14)-Cl(2)-O(13)   | 69.3(2)    | O(14)-Cl(2)-O(13)#1   | 69.3(2) O(13)-  |
| Cl(2)-O(13)#1       | 111.5(4)   | O(14)-Cl(2)-O(15)#1   | 117.3(5) O(13)- |
| Cl(2)-O(15)#1       | 170.2(5)   | O(13)#1-Cl(2)-O(15)#1 | 78.2(5) O(14)-  |
| Cl(2)-O(15)         | 117.3(5)   | O(13)-Cl(2)-O(15)     | 78.2(5)         |
| O(13)#1-Cl(2)-O(15) | 170.2(5)   | O(15)#1-Cl(2)-O(15)   | 92.1(9)         |
| O(14)-Cl(2)-O(16)   | 178.2(4)   | O(13)-Cl(2)-O(16)     | 111.6(3)        |
| O(13)#1-Cl(2)-O(16) | 111.6(3)   | O(15)#1-Cl(2)-O(16)   | 61.6(5)         |
| O(15)-Cl(2)-O(16)   | 61.6(5)    | O(14)-Cl(2)-O(11)     | 94.9(4)         |
| O(13)-Cl(2)-O(11)   | 117.8(2)   | O(13)#1-Cl(2)-O(11)   | 117.8(2)        |
| O(15)#1-Cl(2)-O(11) | 56.1(5)    | O(15)-Cl(2)-O(11)     | 56.1(5)         |
| O(16)-Cl(2)-O(11)   | 83.3(5)    | O(14)-Cl(2)-O(17)     | 58.1(7)         |
| O(13)-Cl(2)-O(17)   | 100.6(4)   | O(13)#1-Cl(2)-O(17)   | 100.6(4)        |
| O(15)#1-Cl(2)-O(17) | 78.5(7)    | O(15)-Cl(2)-O(17)     | 78.5(7)         |
| O(16)-Cl(2)-O(17)   | 120.1(8)   | O(11)-Cl(2)-O(17)     | 36.8(7)         |
| O(14)-Cl(2)-O(12)   | 136.0(4)   | O(13)-Cl(2)-O(12)     | 87.1(3)         |
| O(13)#1-Cl(2)-O(12) | 87.1(3)    | O(15)#1-Cl(2)-O(12)   | 91.9(6)         |
| O(15)-Cl(2)-O(12)   | 91.9(6)    | O(16)-Cl(2)-O(12)     | 45.9(5)         |

---

|                   |          |                   |          |
|-------------------|----------|-------------------|----------|
| O(11)-Cl(2)-O(12) | 129.1(5) | O(17)-Cl(2)-O(12) | 166.0(8) |
|-------------------|----------|-------------------|----------|

---

*Hydrogen bonds / Å and °*

---

| D-H...A              | d(D-H) | d(H...A) | d(D...A) | <(DHA) |
|----------------------|--------|----------|----------|--------|
| N(1)-H(1C)...O(2)#3  | 0.92   | 2.14     | 2.97(2)  | 151(3) |
| N(1)-H(1C)...O(1)#3  | 0.92   | 2.22     | 2.90(1)  | 130(3) |
| N(1)-H(1E)...O(3)#3  | 0.92   | 2.19     | 2.91(2)  | 135(2) |
| O(1W)-H(1WB)...O(2)  | 0.86   | 3.07     | 3.591(1) | 121(1) |
| N(2)-H(2C)...O(15)#1 | 0.92   | 2.21     | 3.05 (3) | 151(3) |
| N(2)-H(2D)...O(10)#5 | 0.93   | 2.21     | 3.13(5)  | 168(3) |
| N(2)-H(2C)...O(11)   | 0.92   | 2.08     | 2.86(1)  | 143(5) |
| N(2)-H(2C)...O(16)   | 0.92   | 2.12     | 3.01(1)  | 165(5) |

---

Symmetry transformations used to generate equivalent atoms: #1 x, -y+1/2, z  
 #2 x, -y+3/2, z; #3 x, -y+1/2, z+1; #4 x, y, z+1; #5 2-x, -1/2 + y, 1-z
